# Supplementary material for: Nonvolatile magnetoelectric coupling in two-dimensional van der Waals sandwich heterostructure CuInP2S6/MnCl3/CuInP2S6
Source: Royal Society of Chemistry journal article supplement (doi:10.1039/d3cp03798c), 2023-01-01
Supplement: d3cp03798c1.pdf [file d3cp03798c1.pdf]

## Supplementary Information

### **Nonvolatile magnetoelectric coupling in two-dimensional van der Waals sandwich heterostructure $\text{CuInP}_2\text{S}_6/\text{MnCl}_3/\text{CuInP}_2\text{S}_6$**

Zichun Wang, Honggang Pan,\* Baozeng Zhou\*

*Tianjin Key Laboratory of Film Electronic & Communicate Devices, School of Integrated Circuit Science and Engineering, Tianjin University of Technology, Tianjin 300384, China*

\*Corresponding Authors

[phg022@163.com](mailto:phg022@163.com) (H. Pan)

[baozeng@tju.edu.cn](mailto:baozeng@tju.edu.cn) (B. Zhou)

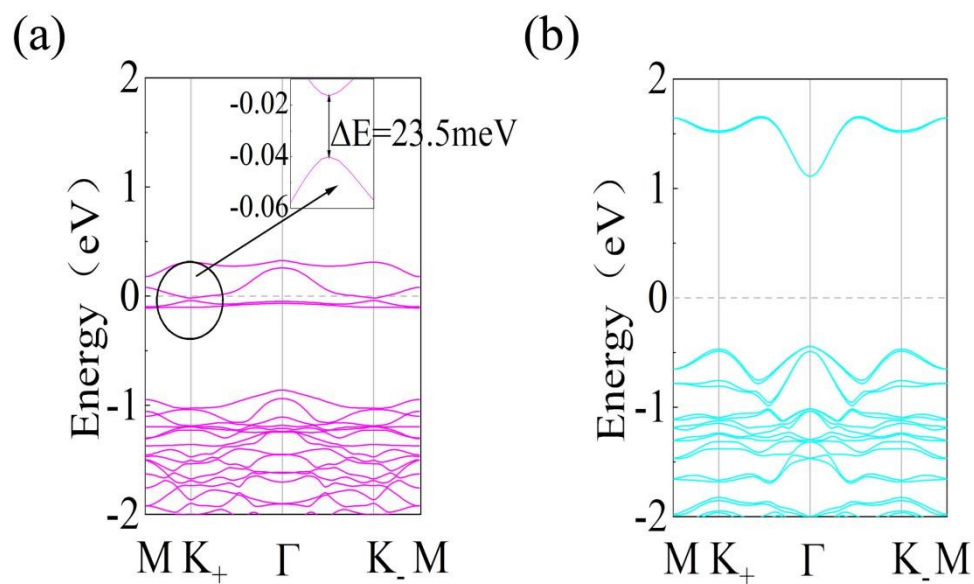

**Fig. S1** Band structures of (a) pristine  $\text{MnCl}_3$  and (b)  $\text{CuInP}_2\text{S}_6$  with SOC. The Fermi level is set to zero.

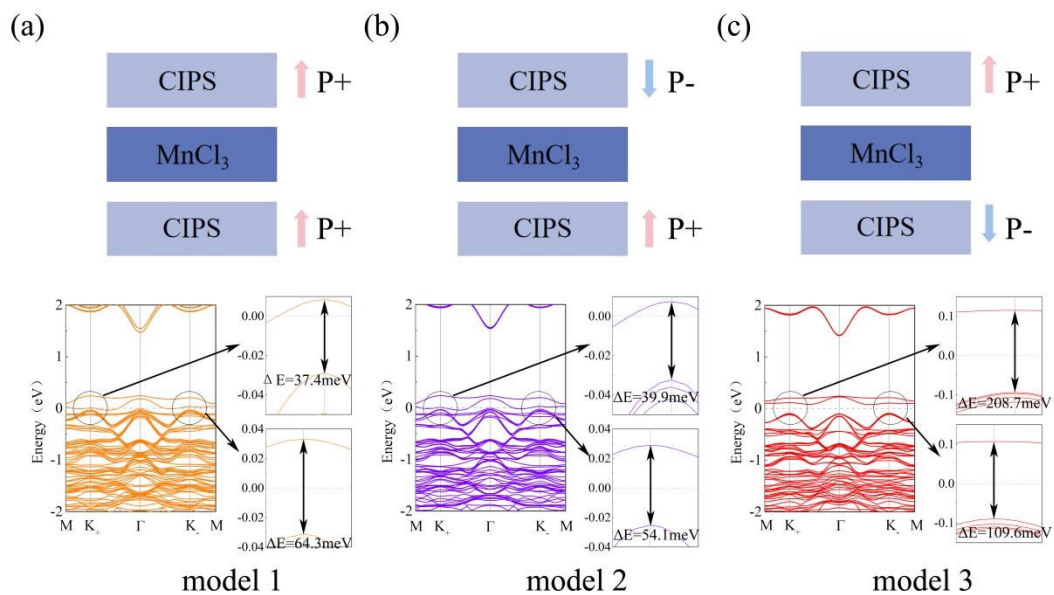

**Fig. S2** Band structures of (a) model 1, (b) model 2, and (c) model 3 with SOC. The Fermi level is set to zero. The band-gap at the K<sub>+</sub> and K<sub>-</sub> points are marked.

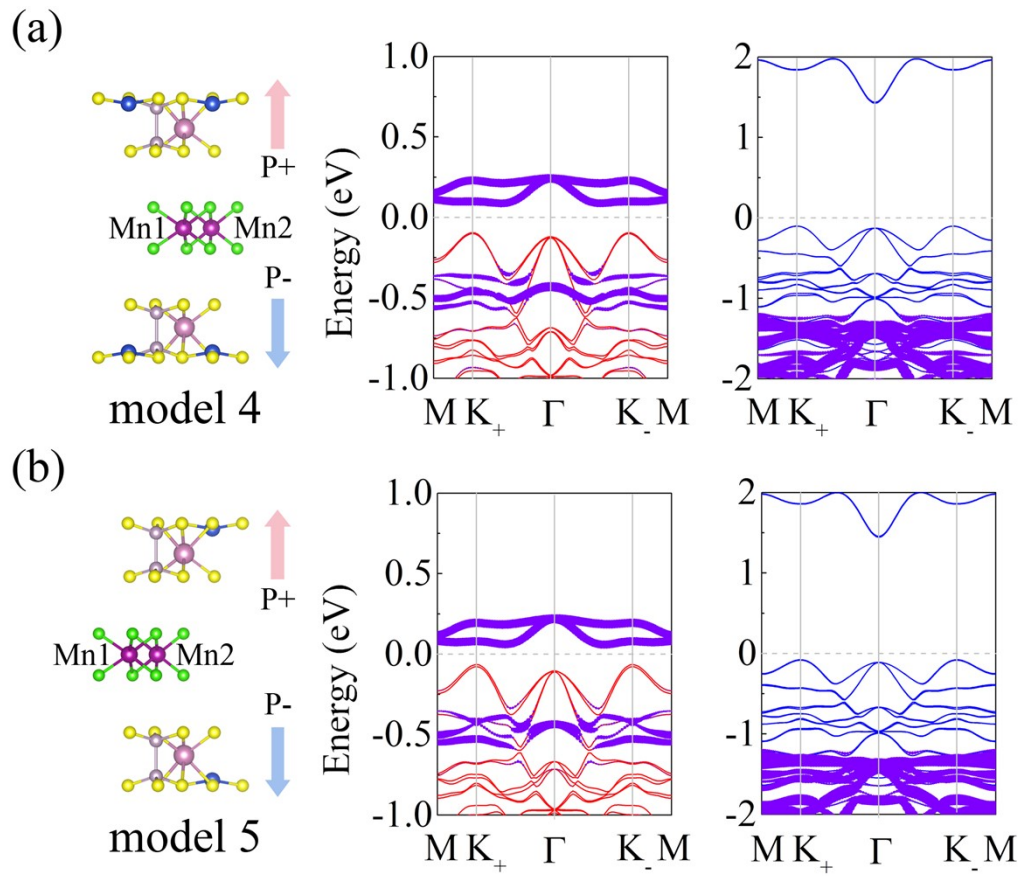

**Fig. S3** Atomic and projected band structures of (a) model 4 and (b) model 5 with different stacking arrangements as compared to model 3, without changing the polarized states of  $\text{CuInP}_2\text{S}_6$ .

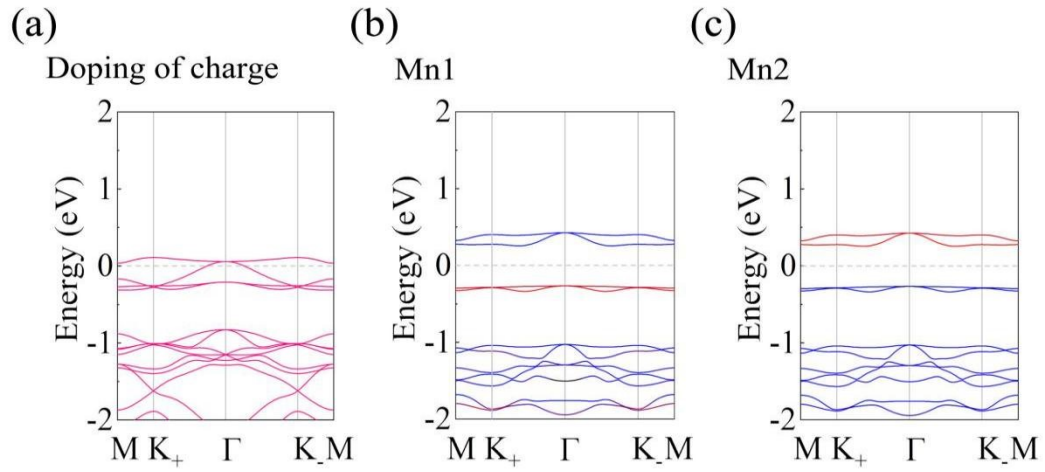

**Fig. S4** Band structures of (a) pristine  $MnCl_3$  monolayer after electron doping. (b) and (c) are the projected band structures of  $MnCl_3$  in the vdW sandwich heterostructure. The red lines denote the contributions from Mn1 and Mn2, as shown in the atomic structure diagram. The Fermi level is set to zero

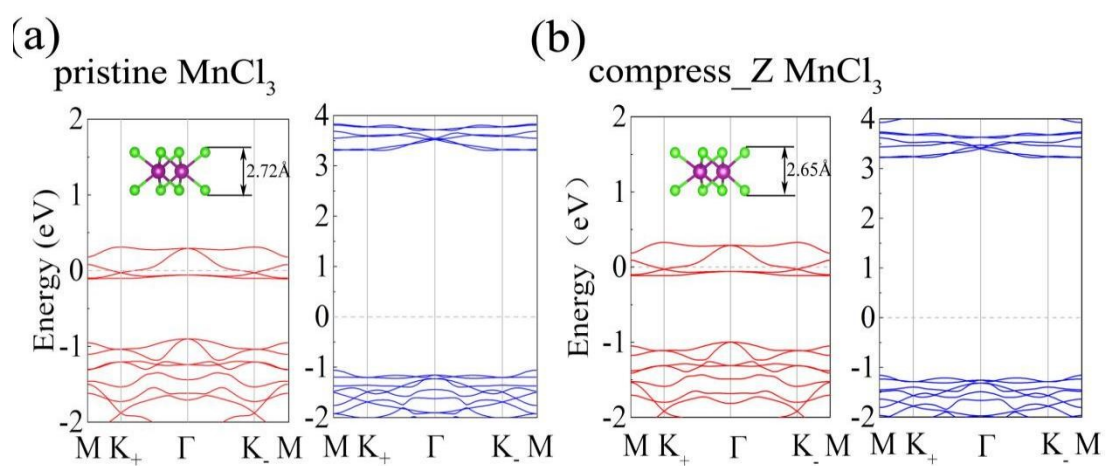

**Fig. S5** Electronic band structures of (a) pristine MnCl<sub>3</sub> monolayer and (b) isolated MnCl<sub>3</sub> with the thickness compress to 2.65 Å.
